# Supplementary material for: Polyphenols from Thinned Young Apples: HPLC-HRMS Profile and Evaluation of Their Anti-Oxidant and Anti-Inflammatory Activities by Proteomic Studies
Source: MDPI journal article supplement (doi:10.3390/antiox11081577), 2022-08-15
Supplement: s1 [file s1]

**Table S1.** Compounds identified or putatively identified by LC -HRMS in negative and positive ion modes with the targeted method ordered on the basis of the retention time.

| Peak                              | Compound name                                | RT   | [M-H] <sup>-</sup> <sub>exp</sub> | Δ ppm  | MS/MS                   | [M+H] <sup>+</sup> <sub>exp</sub> | Δ ppm  | MS/MS           | Identification strategy |
|-----------------------------------|----------------------------------------------|------|-----------------------------------|--------|-------------------------|-----------------------------------|--------|-----------------|-------------------------|
| <i>Organic and phenolic acids</i> |                                              |      |                                   |        |                         |                                   |        |                 |                         |
| 1                                 | Citric acid                                  | 2.3  | 191.01979                         | 0.606  | 173                     | -                                 |        |                 | [34]                    |
| 2                                 | Protocatechuic acid glucoside                | 2.7  | 315.07196                         | 0.286  | 153-109                 | -                                 |        |                 | [33]                    |
| 3                                 | Caffeoylquinic acid isomer 1                 | 3.5  | 353.08673                         | 0.006  | 191-179-135             | -                                 |        |                 | [28-29,31,33-36,44]     |
| 3                                 | Protocatechuic acid                          | 3.7  | 153.01971                         | 0.962  | 109                     | -                                 |        |                 | Standard                |
| 3                                 | Glutathionyl chlorogenic acid                | 3.8  | 658.15118                         | -0.641 | 529-466-385-272-193-191 | 660.16360                         | -3.211 | 642-585-531-264 | [32]                    |
| 3                                 | Caffeoyl glucoside isomer 1                  | 3.8  | 341.08752                         | 0.238  | 251-179                 | -                                 |        |                 | [35]                    |
| 3                                 | Caffeoyl glucoside isomer 2                  | 4.3  | 341.08716                         | 0.133  | 179-251-281             | 343.10120                         | -3.323 | -               | [35]                    |
| 4                                 | Coumaroylquinic acid isomer 1                | 5.2  | 337.09229                         | 0.147  | 191-163-119             | 339.10730                         | -0.383 | 147             | [31,38]                 |
| 4                                 | Caffeoyl glucoside isomer 3                  | 5.2  | 341.08660                         | -0.032 | 281-251-179             | 343.10110                         | -3.614 | -               | [35]                    |
| 4                                 | Caffeoylquinic acid isomer 2                 | 5.7  | 353.08649                         | -0.062 | 191-179-135             | 355.10245                         | -1.239 | 163             | [28-29,31,33-36,44]     |
| 5                                 | <i>p</i> -Coumaric acid-O-glucoside isomer 1 | 6.0  | 325.09265                         | 0.264  | 163-119                 | -                                 |        |                 | [31]                    |
| 5                                 | <i>p</i> -Coumaric acid-O-glucoside isomer 2 | 6.9  | 325.09265                         | 0.264  | 163-145-119             | 327.10760                         | 1.253  | -               | [31]                    |
| 6                                 | Caffeic acid                                 | 7.6  | 179.03577                         | 1.052  | 135                     | 181.04961                         | -2.541 | 163             | Standard                |
| 6                                 | Ferulic acid-O-glucoside isomer 1            | 7.8  | 355.10263                         | 0.077  | 235-193                 | 357.11800                         | 2.324  | -               | [31]                    |
| 7                                 | <i>p</i> -Coumaric acid-O-glucoside isomer 3 | 8.3  | 325.09216                         | 0.113  | 163-119                 | 327.10750                         | 0.948  | 309-165-147     | [31]                    |
| 8                                 | Ferulic acid-O-glucoside isomer 2            | 9.1  | 355.10278                         | 0.119  | 295-265-235-193         | 357.11790                         | 2.044  | 339-177         | [31]                    |
| 8                                 | Coumaroylquinic acid isomer 2                | 9.4  | 337.09229                         | 0.147  | 173-163                 | 339.10720                         | -0.678 | 147             | [31,38]                 |
| 9                                 | Ferulic acid-O-glucoside isomer 3            | 10.8 | 355.10284                         | 0.136  | 295-265-235-193         | 357.11810                         | 2.604  | 339-177         | [31]                    |

|                   |                                                |      |            |        |                         |                                    |        |                         |                               |
|-------------------|------------------------------------------------|------|------------|--------|-------------------------|------------------------------------|--------|-------------------------|-------------------------------|
| 12                | <i>p</i> -Coumaric Acid                        | 13.1 | 163.04041  | 0.882  | 119                     | 165.05453                          | -3.756 | 147                     | Standard                      |
| 28                | Dicaffeoylquinic acid                          | 29.3 | 515.11853  | 0.025  | 353-191-179             | 517.13320                          | 0.251  | -                       | [31,38]                       |
| <b>Flavanols</b>  |                                                |      |            |        |                         |                                    |        |                         |                               |
| 4                 | Catechin                                       | 5.4  | 289.07153  | 0.299  | 245-205-271-179<br>5    | 291.08636                          | -1.649 | 273-165-<br>151-139-123 | Standard                      |
| 5                 | Procyanidin B2                                 | 6.9  | 577.13354  | -0.088 | 559-451-425-407-<br>289 | 579.14850                          | -2.987 | 427-409-291             | [29,34-35,42-<br>43]          |
| 7                 | Epicatechin                                    | 8.7  | 289.07144  | 0.268  | 245-205-179             | 291.08643                          | -1.409 | 273-165-<br>151-139-123 | Standard                      |
| 10                | Procyanidin trimer                             | 11.0 | 865.19183  | -0.648 | 695-577-449             | 867.21295                          | -0.773 | 715-577-289             | [28,34-35,41]                 |
| 12                | Procyanidin tetramer                           | 12.9 | 1153.25208 | -0.758 | 1135-739-577            | 1155.27502                         | -1.723 | -                       | [41]                          |
| 13                | Procyanidin trimer                             | 13.8 | 865.19556  | -0.217 | 695-577-407             |                                    |        |                         | [28,34-35,41]                 |
| 14                | Procyanidin pentamer                           | 15.1 | -          |        |                         | 1443.33911                         | -0.887 | -                       | [41]                          |
| 14                | Procyanidin hexamer                            | 15.1 | -          |        |                         | 866.20331<br>[M+2H] <sup>2+</sup>  | -4.237 | -                       | [37]                          |
| 17                | Procyanidin heptamer                           | 19.0 | -          |        |                         | 1010.23633<br>[M+2H] <sup>2+</sup> | -2.323 | -                       | [37]                          |
| 19                | Procyanidin octamer                            | 20.4 | -          |        |                         | 1154.26868<br>[M+2H] <sup>2+</sup> | -1.455 | -                       | [37]                          |
| 21                | Procyanidin nonamer                            | 21.5 | -          |        |                         | 1298.29871<br>[M+2H] <sup>2+</sup> | -2.582 | -                       | [37]                          |
| <b>Flavanones</b> |                                                |      |            |        |                         |                                    |        |                         |                               |
| 15                | Naringenin glucoside (prunin)                  | 17.0 | 433.11041  | -0.580 | 271                     | 435.12848                          | -1.425 | -                       | Standard                      |
| 18                | Eriodictyol-hexoside                           | 20.1 | 449.10785  | 0.003  | 287                     | 451.12317                          | -1.884 | 289                     | [34]                          |
| 30                | Naringin (Naringenin 7-O-<br>neohesperidoside) | 30.7 | -          |        |                         | 581.18567                          | -2.306 | 435-273                 | [31,36]                       |
| 34                | Eriodictyol                                    | 42.9 | 287.05579  | 0.270  | 151-135                 | 289.07101                          | -0.657 | -                       | [31,36]                       |
| 38                | Naringenin                                     | 53.1 | 271.06076  | 0.243  | 177-151                 | 273.07584                          | -1.611 | -                       | [31,36,39]                    |
| <b>Flavonols</b>  |                                                |      |            |        |                         |                                    |        |                         |                               |
| 16                | Kaempferol-glucoside                           | 18.9 | 447.09161  | -0.129 | 285                     | 449.10751                          | -1.915 | 287                     | [29,31,36]                    |
| 20                | Quercetin-3-O-glucoside                        | 21.0 | 463.08673  | -0.080 | 301                     | 465.10236                          | -1.978 | 303                     | [28,30-31,34-<br>35,40-41,44] |
| 22                | Quercetin-3-O-galactoside                      | 22.5 | 463.08694  | -0.035 | 301                     | 465.10211                          | -2.516 | 303                     | Standard                      |

|                                |                                    |      |           |        |                     |           |        |                         |                           |
|--------------------------------|------------------------------------|------|-----------|--------|---------------------|-----------|--------|-------------------------|---------------------------|
| 24                             | Quercetin pentoside isomer 1       | 24.8 | 433.07687 | 0.079  | 301                 | 435.09180 | -2.114 | 303                     | [28,30-31,34-35,40-41,44] |
| 26                             | Quercetin pentoside isomer 2       | 28.0 | 433.07675 | 0.051  | 301                 | 435.09171 | -2.321 | 303                     | [28,30-31,34-35,40-41,44] |
| 28                             | Quercetin pentoside isomer 3       | 29.0 | 433.07715 | 0.143  | 301                 | 435.09186 | -1.977 | 303                     | [28,30-31,34-35,40-41,44] |
| 29                             | Quercetin-3-O-rhamnoside           | 29.8 | 447.09262 | 0.097  | 301                 | 449.10730 | -2.382 | 303                     | Standard                  |
| 35                             | Quercetin                          | 48.0 | 301.03476 | 0.159  | 273-232-179-151     | 303.04999 | -1.551 | 285-257-229-165-153-137 | Standard                  |
| 40                             | Kaempferol                         | 54.7 | 285.04013 | 0.268  | 155                 | 287.05511 | -1.533 | -                       | Standard                  |
| 40                             | Isorhamnetin                       | 54.7 | 315.05054 | 0.194  | 300                 | 317.06567 | -1.388 | 302                     | [36]                      |
| <b><i>Dihydrochalcones</i></b> |                                    |      |           |        |                     |           |        |                         |                           |
| 27                             | Phloretin-O-xyloglucoside isomer 1 | 28.8 | 567.17010 | -0.128 | 273-167             | 569.18561 | -2.460 | 437-419-275             | [28,31,33-35,41-42]       |
| 29                             | Phloretin-O-xyloglucoside isomer 2 | 30.0 | 567.17072 | -0.019 | 273-167             | 569.18579 | -2.143 | 437-275                 | [28,31,33-35,41-42]       |
| 31                             | Phlorizin                          | 35.0 | 435.12845 | -0.152 | 273                 | 437.14401 | -1.693 | 275                     | Standard                  |
| 39                             | Phloretin                          | 54.1 | 273.07593 | 0.066  | 167                 | 275.09190 | -0.109 | 169-149-127-107         | Standard                  |
| <b><i>Flavones</i></b>         |                                    |      |           |        |                     |           |        |                         |                           |
| 36                             | Luteolin                           | 49.1 | 285.04013 | 0.268  | 241-217-199-175-151 | 287.05527 | -0.975 | 269-245-153             | Standard                  |
| <b><i>Triterpenoids</i></b>    |                                    |      |           |        |                     |           |        |                         |                           |
| 44                             | Euscaphic acid                     | 65.0 | 487.34171 | -0.127 | -                   | 489.35681 | -2.370 | 471-453-443-425-407     | [41]                      |

**Table S2.** Compounds putatively identified by LC -HRMS in negative and positive ion modes with the untargeted method ordered on the basis of the retention time.

[illegible]

|    |                                                         |      |           |       |                                 |                                  |        |             |         |
|----|---------------------------------------------------------|------|-----------|-------|---------------------------------|----------------------------------|--------|-------------|---------|
| 42 | (10E,15Z)-9,12,13-Trihydroxy-10,15-octadecadienoic acid | 55.7 | 327.21707 | 0.146 | <a href="#">291-229-211-171</a> | 351.21414<br>[M+Na] <sup>+</sup> | -1.680 | 333-315-235 | mzCloud |
| 43 | Trihydroxy-octadecenoic acid                            | 57.2 | 329.23251 | 0.082 | 293-229-211-183-171             | 353.22964<br>[M+Na] <sup>+</sup> | -2.095 | 335-317-235 | mzCloud |
